# Supplementary material for: A disposal-MOX concept for plutonium disposition
Source: Royal Society of Chemistry journal article supplement (doi:10.1039/d4ma00420e), 2024-01-01
Supplement: d4ma00420e1.pdf [file d4ma00420e1.pdf]

## A disposal-MOX concept for plutonium disposition: Supplementary Information

Max R. Cole<sup>1</sup>, Lewis R. Blackburn<sup>1</sup>, Daniel J. Bailey<sup>1</sup>, Latham T. Haigh<sup>1</sup>, Luke T. Townsend<sup>1</sup>,  
Kristina O.Kvashnina<sup>2,3</sup>, Neil C. Hyatt<sup>4,5</sup> and Claire L. Corkhill<sup>\*4</sup>

<sup>1</sup> Immobilisation Science Laboratory, Department of Materials Science and Engineering, The University of Sheffield, UK

<sup>2</sup> Helmholtz-Zentrum Dresden-Rossendorf (HZDR), Institute of Resource Ecology, Germany

<sup>3</sup> The Rossendorf Beamline at ESRF – The European Synchrotron, CS40220, 38043 Grenoble Cedex 9, France

<sup>4</sup> School of Earth Sciences and the South West Nuclear Hub, The University of Bristol, UK

<sup>5</sup> School of Mechanical and Materials Engineering, Washington State University, Pullman, USA

Corresponding author: [c.corkhill@bristol.ac.uk](mailto:c.corkhill@bristol.ac.uk)

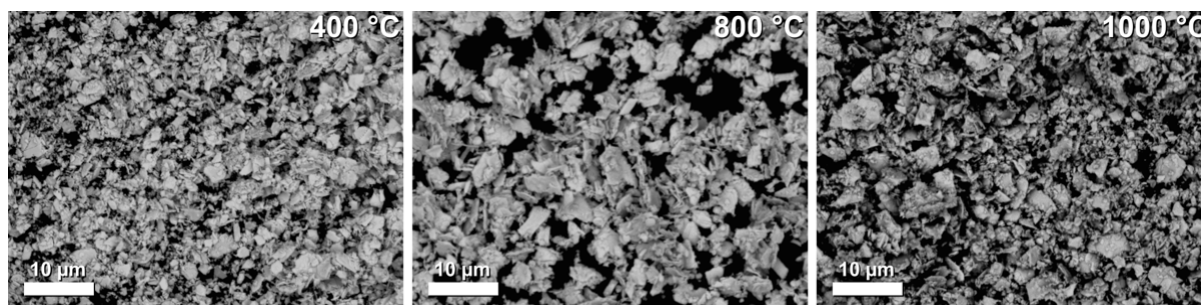

**Supplementary Figure 1.** SEM micrographs revealing platelet morphology of  $U_{0.798}Th_{0.200}Gd_{0.002}O_{2.5}$  oxide powders obtained by calcination of co-precipitated material at 800 °C

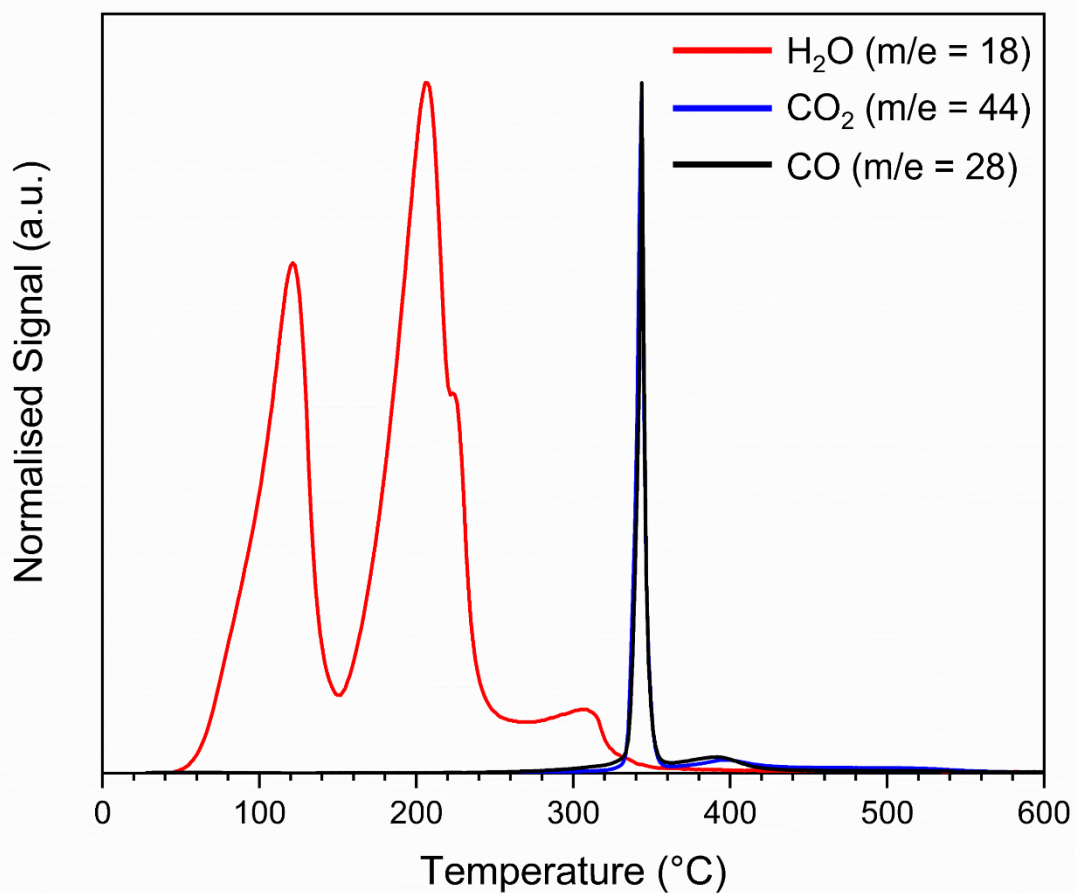

**Supplementary Figure 2.** TG-MS data collected during calcination of  $U_{0.890}Th_{0.100}Gd_{0.010}O_{2.5}$  prepared by co-precipitation route.

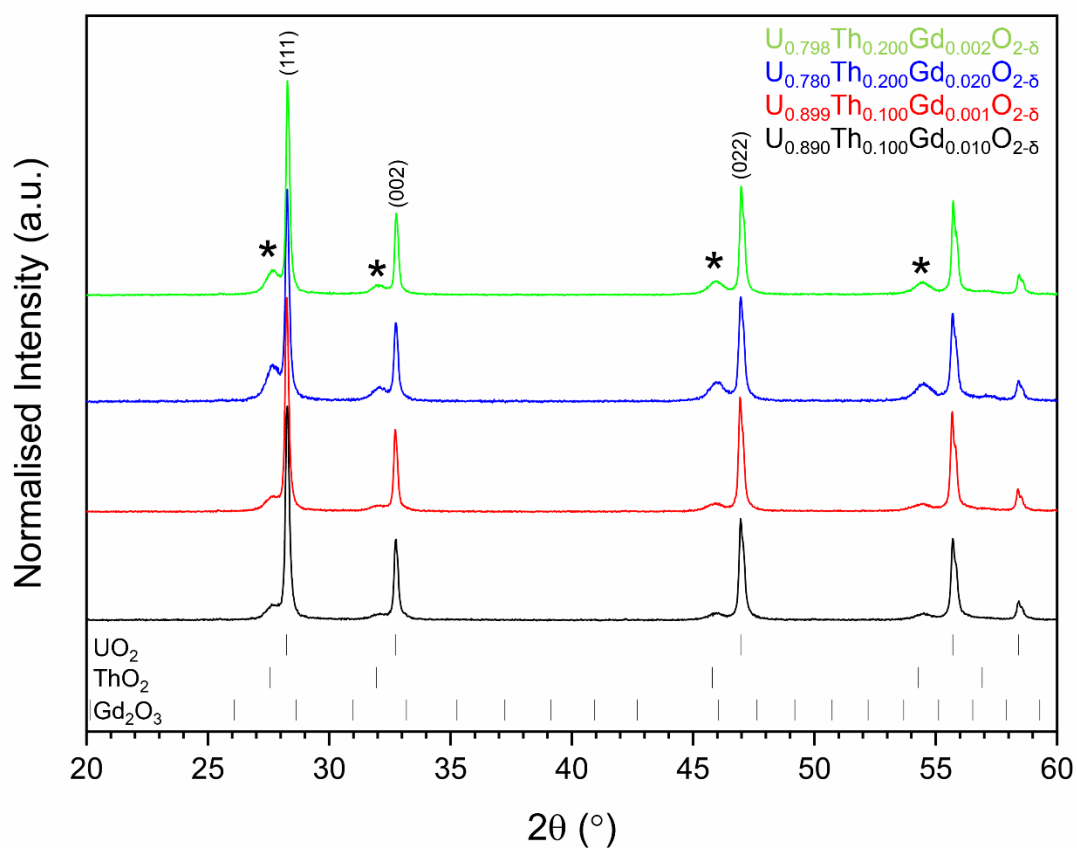

**Supplementary Figure 3.** XRD data for oxides obtained from decomposition of oxalates at 800 °C. Two sets of fluorite reflections were readily indexed to  $UO_2$  (ICSD 160814) labelled with (hkl) values and  $ThO_2$  (ICSD 253564) labelled with asterisks. The relative intensity of  $ThO_2$ -rich peaks corresponds with measured compositions. Peak shift in the  $ThO_2$ -rich reflections was attributed to incorporation of  $U^{4+}$  and  $Gd^{3+}$ . No peaks corresponding to cubic C-type  $Gd_2O_3$  (ICSD 94892), or monoclinic  $Gd_2O_3$  were observed.

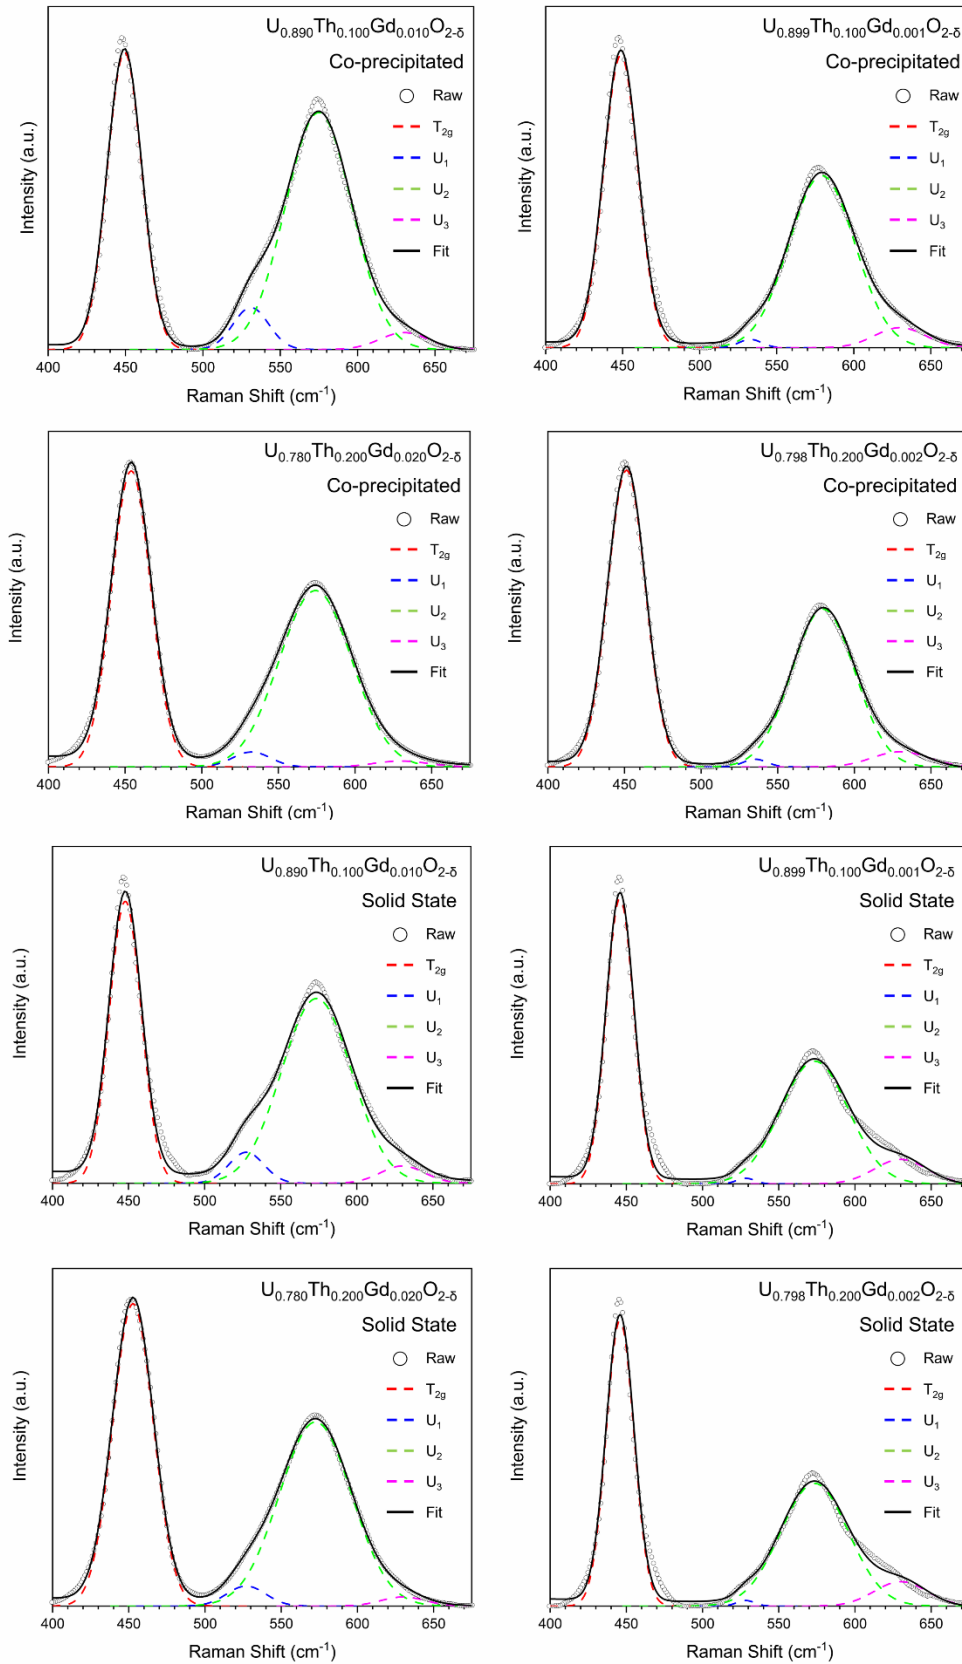

**Supplementary Figure 4.** Complete set of deconvoluted Raman spectra for disposal MOX materials fabricated by co-precipitation and solid state route

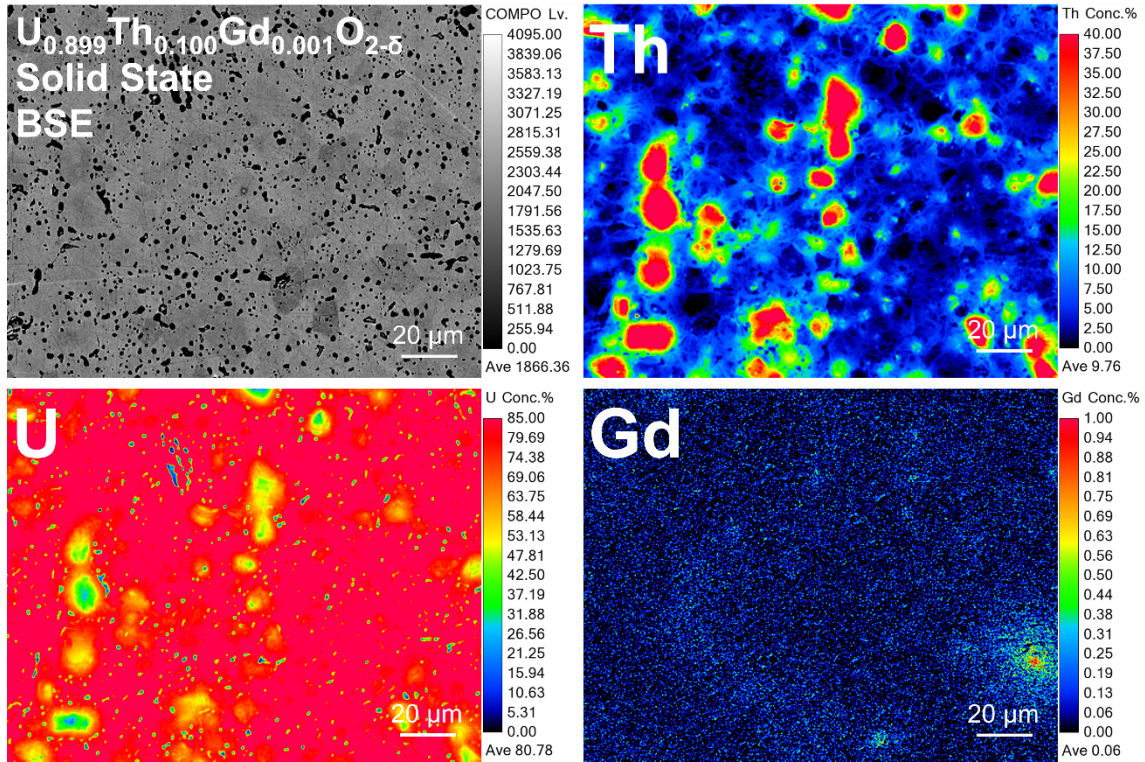

**Supplementary Figure 5.** EPMA maps for U, Th and Gd present in disposal MOX with nominal formulation  $U_{0.899}Th_{0.100}Gd_{0.001}O_{2-\delta}$  fabricated by the solid-state route.

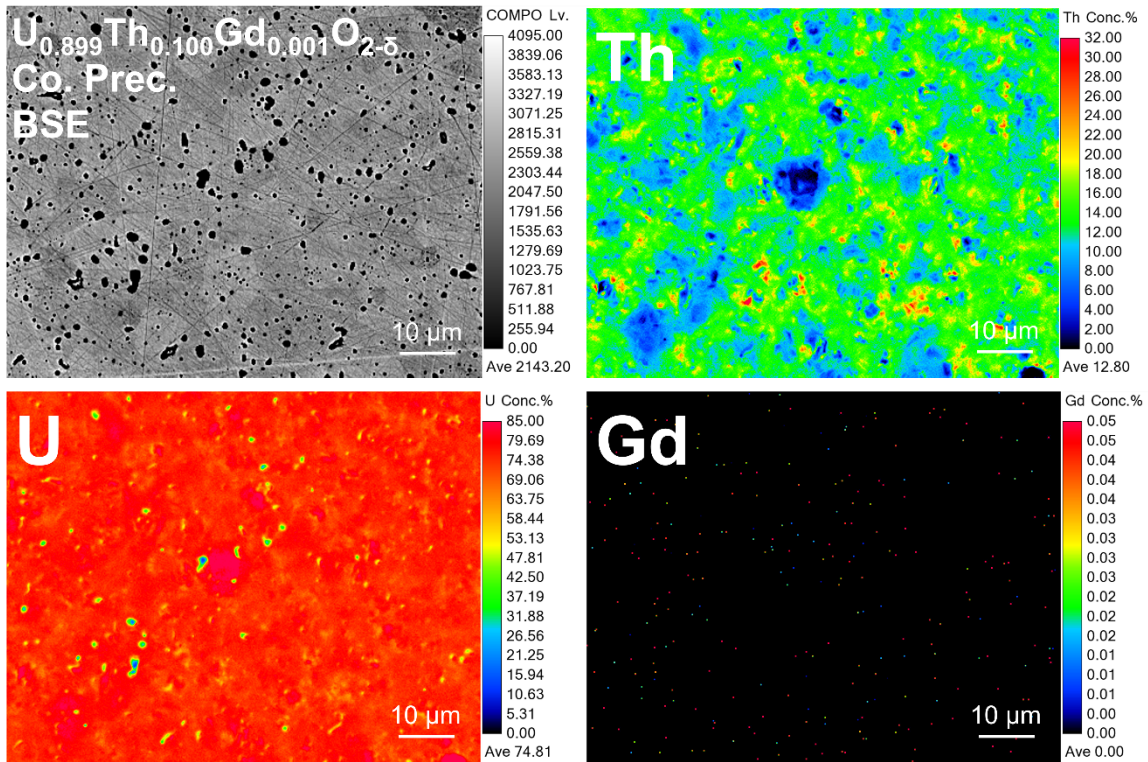

**Supplementary Figure 6.** EPMA maps for U, Th and Gd present in disposal MOX with nominal formulation  $U_{0.899}Th_{0.100}Gd_{0.001}O_{2-\delta}$  fabricated by the co-precipitation route.

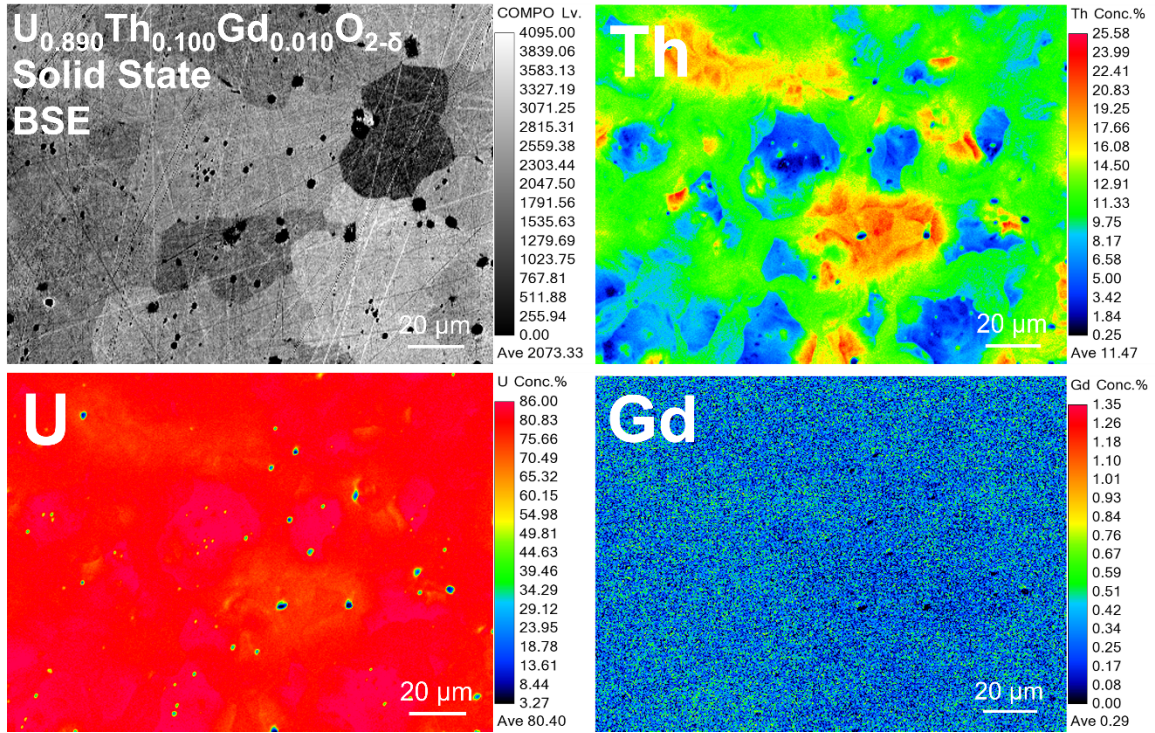

Supplementary Figure 7. EPMA maps for U, Th and Gd present in disposal MOX with nominal formulation  $U_{0.890}Th_{0.100}Gd_{0.010}O_{2-\delta}$  fabricated by the solid-state route.

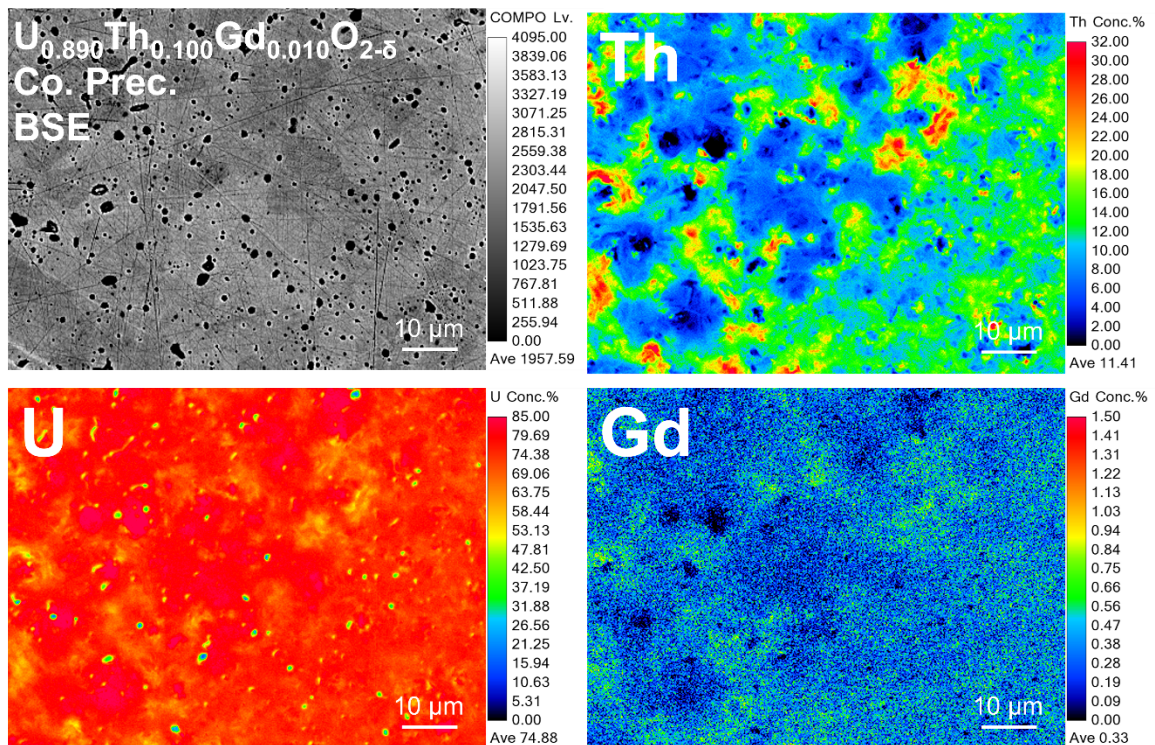

Supplementary Figure 8. EPMA maps for U, Th and Gd present in disposal MOX with nominal formulation  $U_{0.890}Th_{0.100}Gd_{0.010}O_{2-\delta}$  fabricated by the co-precipitation route.

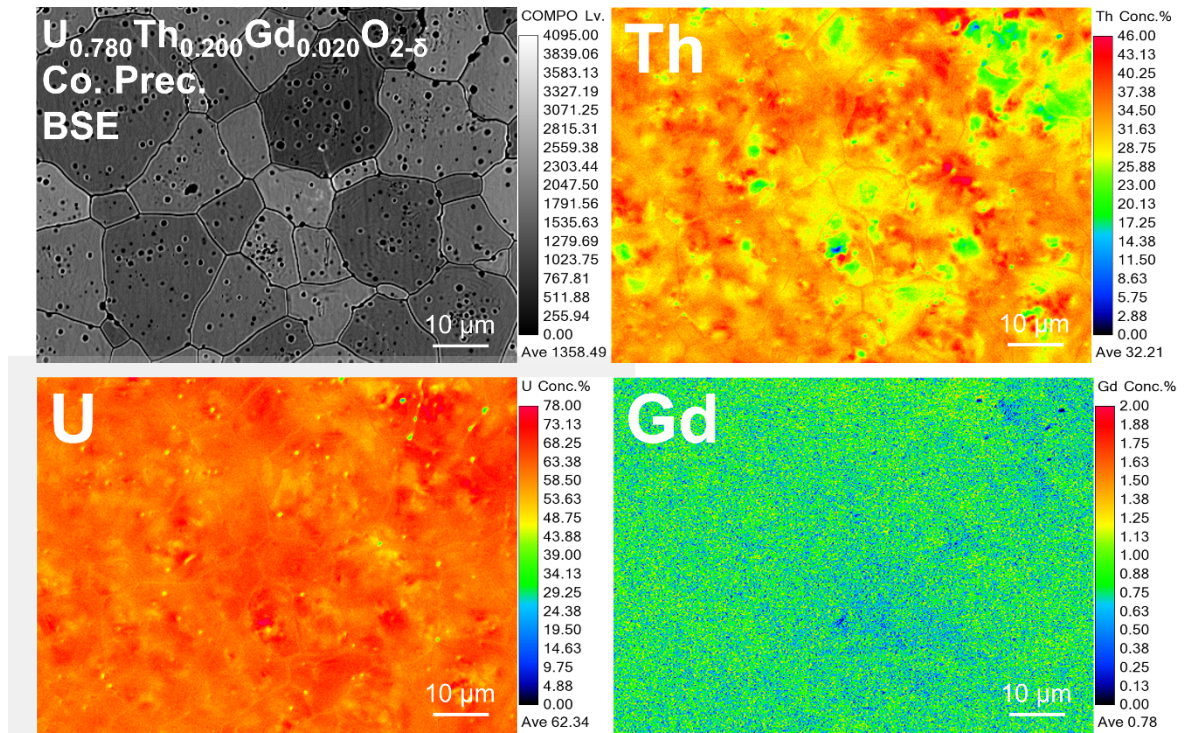

**Supplementary Figure 9.** EPMA maps for U, Th and Gd present in disposal MOX with nominal formulation  $U_{0.780}Th_{0.200}Gd_{0.020}O_{2-\delta}$  fabricated by the co-precipitation route.

**Supplementary Table 1.** Tabulated values for deconvoluted Raman spectra

| Synthesis   | Composition                                                                 | T <sub>2g</sub> Pos. (cm <sup>-1</sup> ) | T <sub>2g</sub> FWHM (cm <sup>-1</sup> ) | U <sub>1</sub> Pos. (cm <sup>-1</sup> ) | U <sub>1</sub> FWHM (cm <sup>-1</sup> ) | U <sub>2</sub> Pos. (cm <sup>-1</sup> ) | U <sub>2</sub> FWHM (cm <sup>-1</sup> ) | U <sub>3</sub> Pos. (cm <sup>-1</sup> ) | U <sub>3</sub> FWHM (cm <sup>-1</sup> ) | χ <sup>2</sup> |
|-------------|-----------------------------------------------------------------------------|------------------------------------------|------------------------------------------|-----------------------------------------|-----------------------------------------|-----------------------------------------|-----------------------------------------|-----------------------------------------|-----------------------------------------|----------------|
| Co-prec.    | U <sub>0.899</sub> Th <sub>0.100</sub> Gd <sub>0.001</sub> O <sub>2-δ</sub> | 448.82 ± 0.09                            | 26.39 ± 0.23                             | 532.84 ± 2.74                           | 17.53 ± 7.28                            | 579.29 ± 0.48                           | 50.39 ± 1.42                            | 630 ± 0.00                              | 38.73 ± 8.25                            | 0.09           |
| Co-prec.    | U <sub>0.890</sub> Th <sub>0.100</sub> Gd <sub>0.010</sub> O <sub>2-δ</sub> | 449.34 ± 0.08                            | 26.24 ± 0.23                             | 531.01 ± 1.07                           | 27.07 ± 2.41                            | 574.80 ± 0.27                           | 50.70 ± 1.32                            | 630 ± 0.00                              | 36.95 ± 8.81                            | 0.09           |
| Co-prec.    | U <sub>0.798</sub> Th <sub>0.200</sub> Gd <sub>0.002</sub> O <sub>2-δ</sub> | 451.30 ± 0.05                            | 28.93 ± 0.14                             | 535.30 ± 1.82                           | 18.49 ± 4.91                            | 579.64 ± 0.39                           | 48.52 ± 1.04                            | 630 ± 0.00                              | 43.04 ± 8.35                            | 0.03           |
| Co-prec.    | U <sub>0.798</sub> Th <sub>0.200</sub> Gd <sub>0.002</sub> O <sub>2-δ</sub> | 453.95 ± 0.03                            | 30.31 ± 0.09                             | 532.44 ± 1.49                           | 29.24 ± 3.71                            | 574.24 ± 0.22                           | 55.81 ± 1.36                            | 630 ± 0.00                              | 41.56 ± 13.96                           | 0.01           |
| Solid State | U <sub>0.899</sub> Th <sub>0.100</sub> Gd <sub>0.001</sub> O <sub>2-δ</sub> | 445.83 ± 0.09                            | 21.46 ± 0.23                             | 528.24 ± 3.74                           | 13.98 ± 10.13                           | 573.45 ± 0.59                           | 52.31 ± 1.83                            | 630 ± 0.00                              | 40.81 ± 7.06                            | 0.12           |
| Solid State | U <sub>0.890</sub> Th <sub>0.100</sub> Gd <sub>0.010</sub> O <sub>2-δ</sub> | 447.83 ± 0.09                            | 24.91 ± 0.25                             | 527.43 ± 1.39                           | 26.98 ± 3.31                            | 573.55 ± 0.36                           | 54.38 ± 1.68                            | 630 ± 0.00                              | 34.10 ± 7.63                            | 0.11           |
| Solid State | U <sub>0.798</sub> Th <sub>0.200</sub> Gd <sub>0.002</sub> O <sub>2-δ</sub> | 448.71 ± 0.08                            | 27.06 ± 0.23                             | 531.44 ± 2.09                           | 19.33 ± 5.64                            | 575.94 ± 0.32                           | 51.38 ± 1.26                            | 630 ± 0.00                              | 38.09 ± 7.80                            | 0.08           |
| Solid State | U <sub>0.798</sub> Th <sub>0.200</sub> Gd <sub>0.002</sub> O <sub>2-δ</sub> | 452.74 ± 0.04                            | 21.45 ± 0.13                             | 526.98 ± 1.27                           | 30.09 ± 2.84                            | 572.48 ± 0.22                           | 55.89 ± 0.95                            | 630 ± 0.00                              | 34.43 ± 6.89                            | 0.02           |
